# Supplementary material for: Generation of donor-specific Tr1 cells to be used after kidney transplantation and definition of the timing of their in vivo infusion in the presence of immunosuppression
Source: PubMed Central journal article supplement (PMC5319067; doi:10.1186/s12967-017-1133-8), 2017-02-21
Supplement: 12967_2017_1133_MOESM1_ESM.pdf [file 12967_2017_1133_MOESM1_ESM.pdf]

**Additional File 1.** Information on probe set used for defining the Tr1 cell signature

| <b>Accession Number</b> | <b>Symbol</b> | <b>Other Names</b>                                                           | <b>Sequence Length</b> | <b>Probe Set Region</b> | <b>Specificity</b><br>designed specifically to hybridize:           |
|-------------------------|---------------|------------------------------------------------------------------------------|------------------------|-------------------------|---------------------------------------------------------------------|
| NM_004131               | GZMB          | HLP; CCPI;<br>CGL1;<br>CSPB;<br>SECT;<br>CGL-1;<br>CSP-B;<br>CTLA1;<br>CTSG1 | 941                    | 425-916                 | human <b>Granzyme B</b>                                             |
| NM_002190               | IL17A         | CTLA8; IL-17; IL17-A                                                         | 1859                   | 980-1731                | human <b>IL17A</b>                                                  |
| NM_005041               | PRF1          | P1; PFP;<br>HLP2;<br>MGC65093                                                | 2529                   | 728-1180                | human <b>Perforin1</b> , both transcript variants                   |
| NM_000572               | IL10          | CSIF; TGIF;<br>IL-10;<br>IL10A                                               | 1629                   | 44-654                  | human <b>IL10</b>                                                   |
| NM_000576               | IL1B          | IL-1; IL1F2;<br>IL1-BETA                                                     | 1498                   | 24-659                  | human <b>IL1<math>\beta</math></b>                                  |
| NM_000589               | IL4           | BSF1; IL-4;<br>MGC79402                                                      | 921                    | 12-558                  | human <b>IL4</b> , both transcript variants                         |
| NM_005018               | PDCD1         | PD1;<br>SLEB2;<br>hPD-1;<br>hPD-I                                            | 2115                   | 255-796                 | human Programmed cell death protein 1 ( <b>PD1</b> )                |
| NM_005214               | CTLA4         | CD152;<br>CTLA-4                                                             | 2033                   | 726-1307                | human Cytotoxic T-lymphocyte-associated protein 4 ( <b>CTLA4</b> )  |
| NM_000194               | HPRT1         | HPRT;<br>HGPRT                                                               | 1435                   | 673-1404                | human Hypoxanthine phosphoribosyltransferase 1 ( <b>HPRT1</b> )     |
| NM_000594               | TNF           | DIF; TNFA;<br>TNFSF2;<br>TNF-alpha                                           | 1669                   | 812-1230                | human Tumor necrosis factor alpha ( <b>TNF<math>\alpha</math></b> ) |
| NM_001558               | IL10RA        | IL10R;<br>CDW210A;<br>HIL-10R;<br>IL-10R1                                    | 3672                   | 255-653                 | human <b>IL10RA</b> , both transcript variants                      |
| NM_000600               | IL6           | HGF; HSF;<br>BSF2; IL-6;<br>IFNB2                                            | 1201                   | 3-669                   | human <b>IL6</b>                                                    |

|           |       |                           |      |           |                                                           |
|-----------|-------|---------------------------|------|-----------|-----------------------------------------------------------|
| NM_001621 | AHR   |                           | 6247 | 1289-1990 | human Aryl hydrocarbon receptor ( <b>AHR</b> )            |
| NM_000660 | TGFB1 | CED;<br>DPD1;<br>TGF-beta | 2217 | 1284-1649 | human Transforming growth factor, beta 1 ( <b>TGFb1</b> ) |
| NM_000619 | IFNG  | IFG; IFI                  | 1240 | 53-438    | human interferon gamma ( <b>IFNg</b> )                    |
