# Supplementary material for: Generation of donor-specific Tr1 cells to be used after kidney transplantation and definition of the timing of their in vivo infusion in the presence of immunosuppression
Source: PubMed Central journal article supplement (PMC5319067; doi:10.1186/s12967-017-1133-8), 2017-02-21
Supplement: 12967_2017_1133_MOESM5_ESM.pdf [file 12967_2017_1133_MOESM5_ESM.pdf]

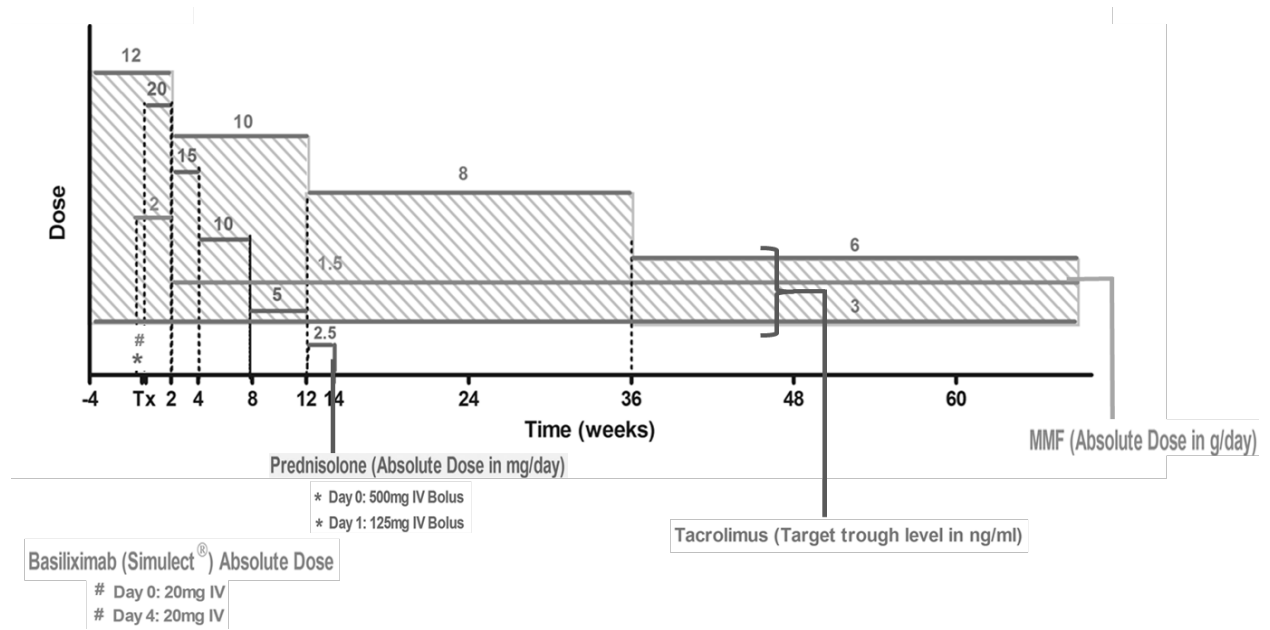

**Additional File 6. Detailed immunosuppressive regimen as foreseen by The ONE Study Reference Trial**
