# Supplementary material for: Generation of donor-specific Tr1 cells to be used after kidney transplantation and definition of the timing of their in vivo infusion in the presence of immunosuppression
Source: Springer Nature journal article supplement (doi:10.1186/s12967-017-1133-8), 2017-02-21
Supplement: MOESM2 [file 12082822]

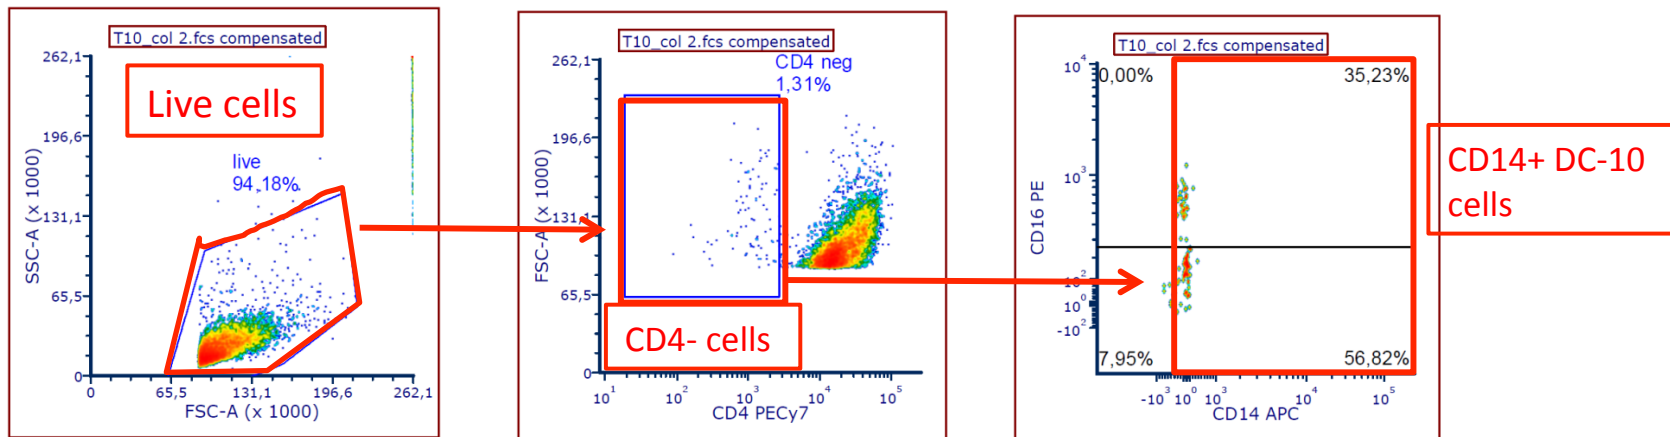

**Additional File 3. DC-10 cells represent the non-CD4+ cell population within the T10 cell preparations.** One representative dot plot of eight of T10 cells. Percentage of CD4<sup>-</sup>CD14<sup>+</sup> cells is shown. Gating was done on live T10 cells.
