# Supplementary material for: Generation of donor-specific Tr1 cells to be used after kidney transplantation and definition of the timing of their in vivo infusion in the presence of immunosuppression
Source: Springer Nature journal article supplement (doi:10.1186/s12967-017-1133-8), 2017-02-21
Supplement: MOESM3 [file 12082822]

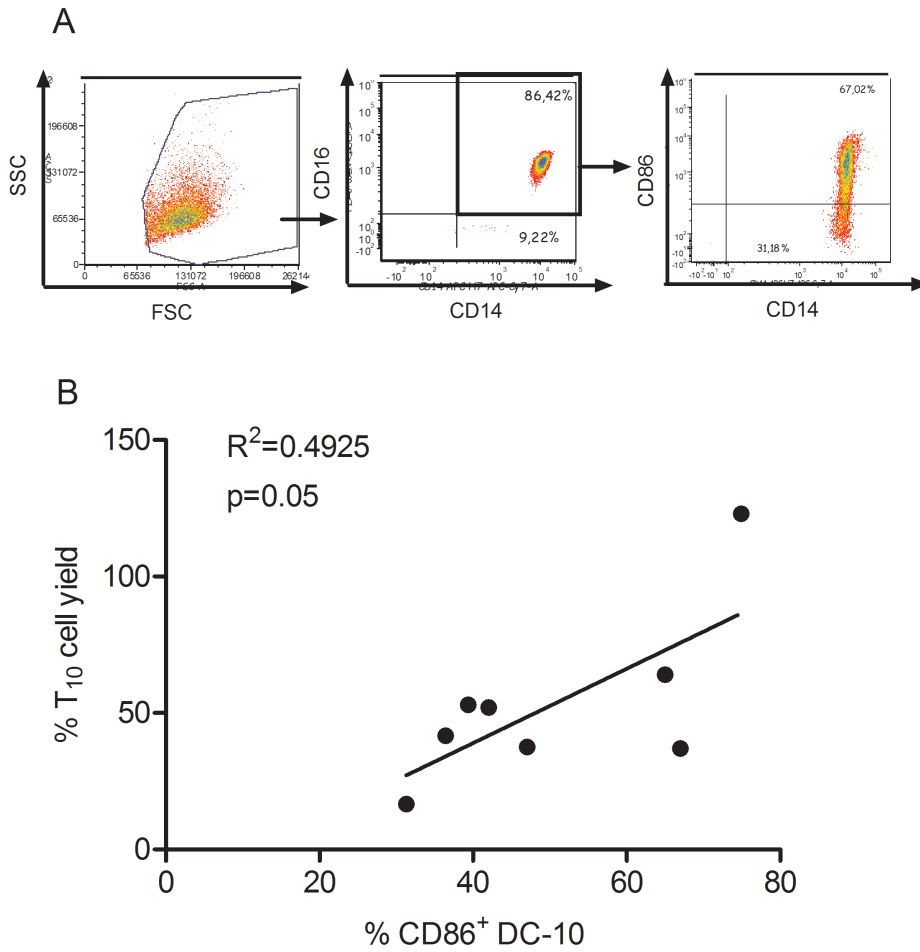

**Additional File 4. Frequency of CD86<sup>+</sup> DC-10 cells correlates with T<sub>10</sub> cell yield.**

Phenotype of one representative preparation (out of eight) of DC-10 is shown (**A**).

Percentages of CD86<sup>+</sup> DC-10 (CD14<sup>+</sup>CD16<sup>+</sup>) are plotted with yield of the corresponding T<sub>10</sub> cells. Line represents linear regression (**B**).
