# Supplementary material for: Generation of donor-specific Tr1 cells to be used after kidney transplantation and definition of the timing of their in vivo infusion in the presence of immunosuppression
Source: Springer Nature journal article supplement (doi:10.1186/s12967-017-1133-8), 2017-02-21
Supplement: MOESM4 [file 12082822]

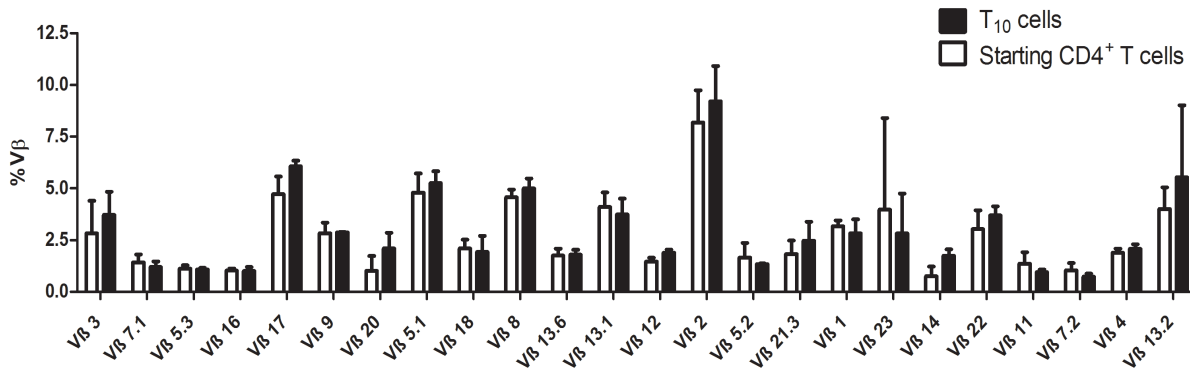

**Additional File 5. The TCR-Vβ repertoire of T<sub>10</sub> cells is similar to that of the starting CD4<sup>+</sup> T cells**

Percentages of Vβ usage in T<sub>10</sub> cells (■) and in the corresponding CD4<sup>+</sup> T cells before culture (□) are shown. Bars represent mean value of each dataset ± SD (n=5 T<sub>10</sub>-cell preparations)
