# Supplementary material for: Generation of donor-specific Tr1 cells to be used after kidney transplantation and definition of the timing of their in vivo infusion in the presence of immunosuppression
Source: Springer Nature journal article supplement (doi:10.1186/s12967-017-1133-8), 2017-02-21
Supplement: MOESM6 [file 12082822]

**Additional File 2.** Dosages of immunosuppressive drugs per patient enrolled in The ONE Study reference group at each time point

|                                            | - 4 weeks<br>PRE<br>transplant |      | + 8 weeks<br>POST<br>transplant |      | + 36 weeks<br>POST<br>transplant |      | + 60 weeks<br>POST<br>transplant |      |
|--------------------------------------------|--------------------------------|------|---------------------------------|------|----------------------------------|------|----------------------------------|------|
|                                            | #003                           | #004 | #003                            | #004 | #003                             | #004 | #003                             | #004 |
| <b>Tacrolimus</b> trough levels<br>(ng/ml) | -                              | -    | 10.6                            | 10.6 | 9.9                              | 5.8  | 9.1                              | 4.3  |
| target levels<br>(ng/ml)                   | -                              | -    | 3-10                            |      | 3-8                              |      | 3-6                              |      |
| <b>Prednisolone</b> (mg/day)               | -                              | -    | 10                              |      | 0                                |      | 0                                |      |
| <b>MMF</b> (g/day)                         | -                              | -    | 1.5                             |      | 1.5                              |      | 1.5                              |      |
| <b>Basiliximab</b> (mg)                    | -                              | -    | 0                               |      | 0                                |      | 0                                |      |
