# Supplementary material for: Generation of donor-specific Tr1 cells to be used after kidney transplantation and definition of the timing of their in vivo infusion in the presence of immunosuppression
Source: Springer Nature journal article supplement (doi:10.1186/s12967-017-1133-8), 2017-02-21
Supplement: MOESM7 [file 12082822]

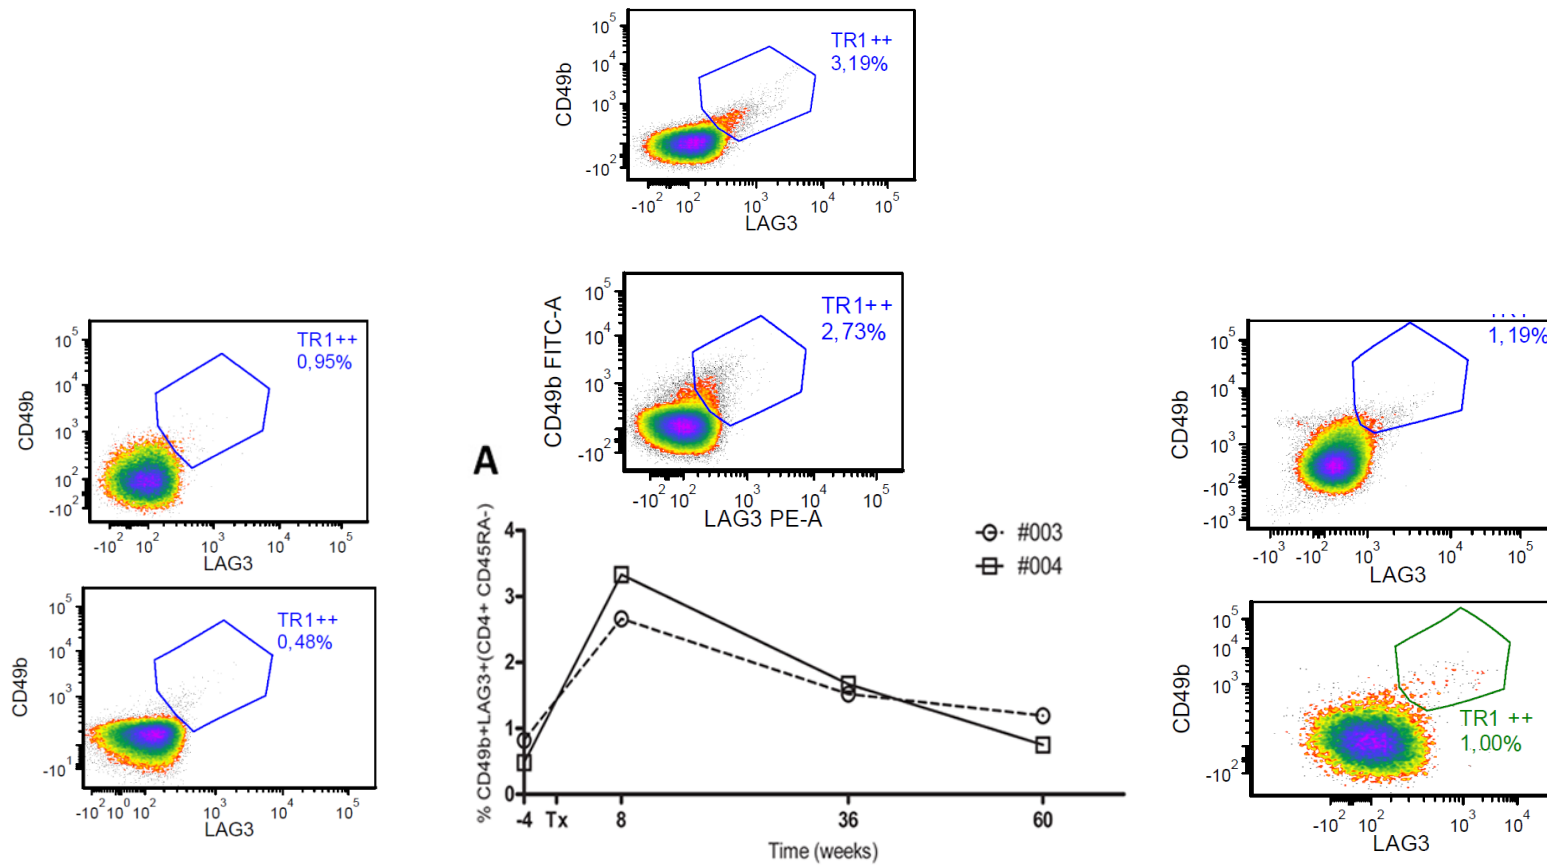

**Additional File 7. Flow cytometry dot plots of circulating Tr1 cells in two kidney transplant recipients under active immunosuppression. Percentages of Tr1 cells (CD49b<sup>+</sup>LAG3<sup>+</sup>) are shown pre- and post-transplantation. Gating was performed on live CD3<sup>+</sup>CD4<sup>+</sup>CD45RA<sup>-</sup> cells.**
