# Supplementary material for: Generation of donor-specific Tr1 cells to be used after kidney transplantation and definition of the timing of their in vivo infusion in the presence of immunosuppression
Source: Springer Nature journal article supplement (doi:10.1186/s12967-017-1133-8), 2017-02-21
Supplement: MOESM8 [file 12082822]

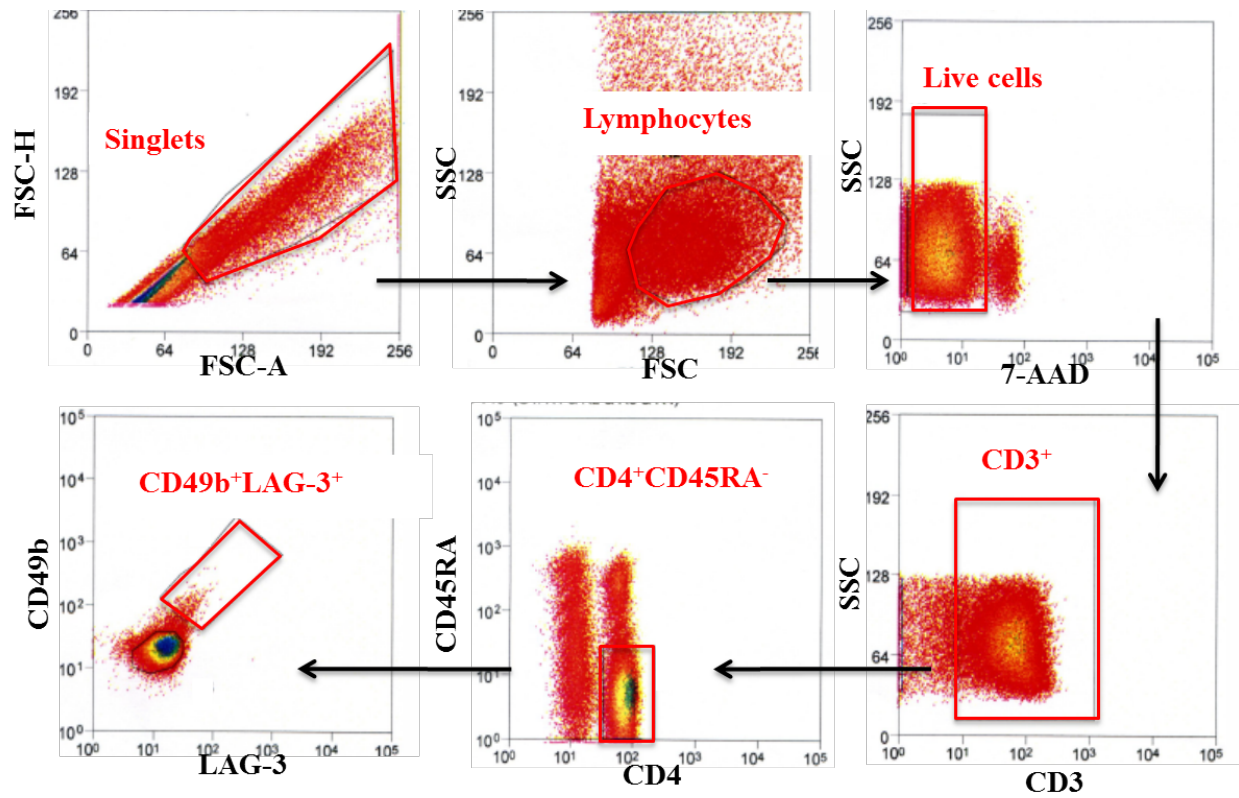

### Additional File 8. Tr1 cell sorting gating strategy

Tr1 cells were sorted from thawed PBMC. Gating strategy is shown: from singlets (FSC-A, FSC-H), to lymphocytes (FSC, SSC), live cells (SSC, 7AAD<sup>-</sup>), T cells (SSC, CD3<sup>+</sup>), memory CD4<sup>+</sup> T cells (CD4<sup>+</sup>CD45RA<sup>-</sup>), and Tr1 cells (CD49b<sup>+</sup>LAG3<sup>+</sup>).
